# Supplementary material for: Vanadium–phosphorous oxide supported on mesoporous SBA-15 catalysts for ammoxidation of toluene to benzonitrile
Source: Royal Society of Chemistry journal article supplement (doi:10.1039/d3nj00818e), 2023-01-01
Supplement: d3nj00818e1.pdf [file d3nj00818e1.pdf]

## Supplementary File

### Vanadium-phosphorous oxide supported on mesoporous SBA-15 catalysts for ammoxidation of toluene to benzonitrile

N. Pethan Rajan<sup>1</sup>, Ginjuppali Srinivasarao<sup>2</sup>, Bhanuchander Ponnala<sup>3</sup>, Hussain SK<sup>3</sup>, Sungtak Kim<sup>4,\*</sup>, Putrakumar Balla<sup>3,4,\*</sup>

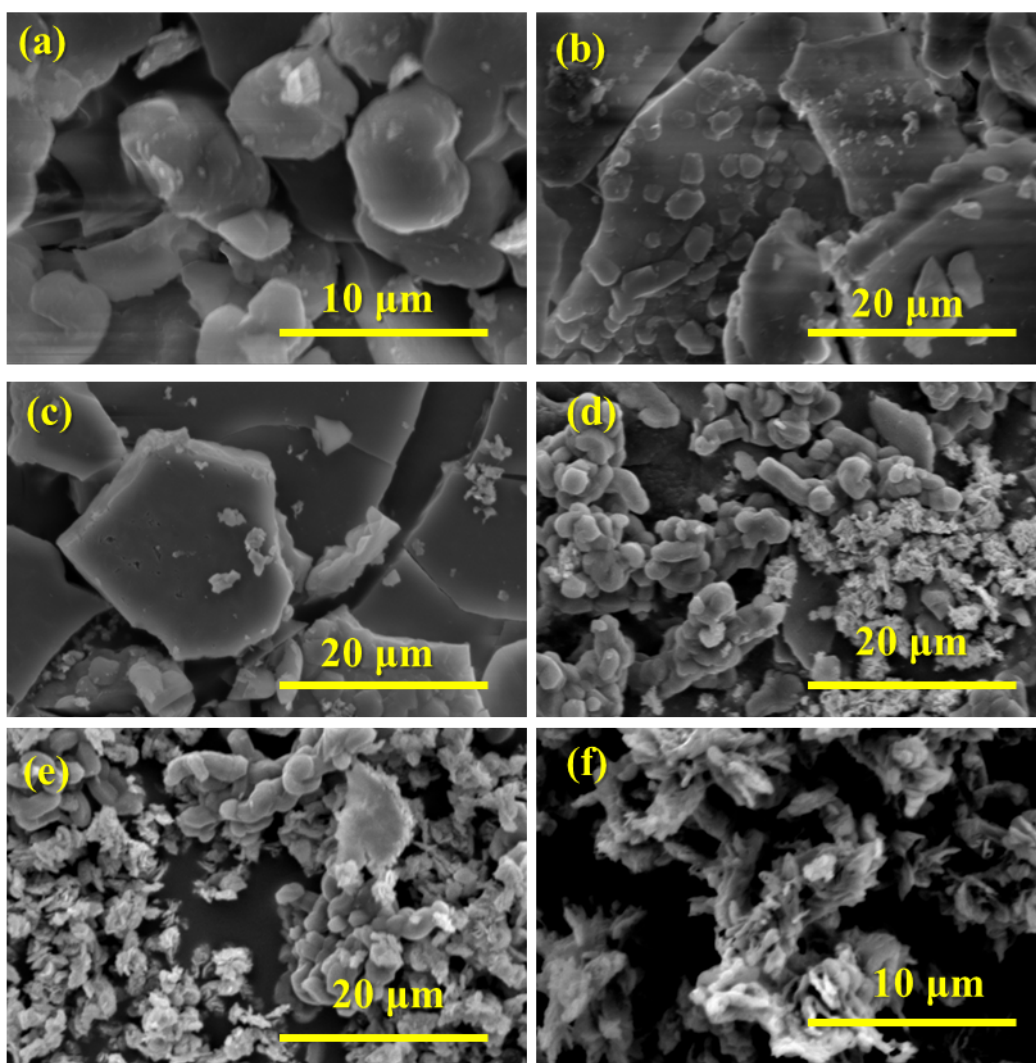

**Figure S1:** SEM images of (a) pure SBA-15 (b) 10 wt% VPO/SBA-15 (c) 20 wt% VPO/SBA-15 (d) 40 wt% VPO/SBA-15 (e) 50 wt% VPO/SBA-15 (f) pure VPO

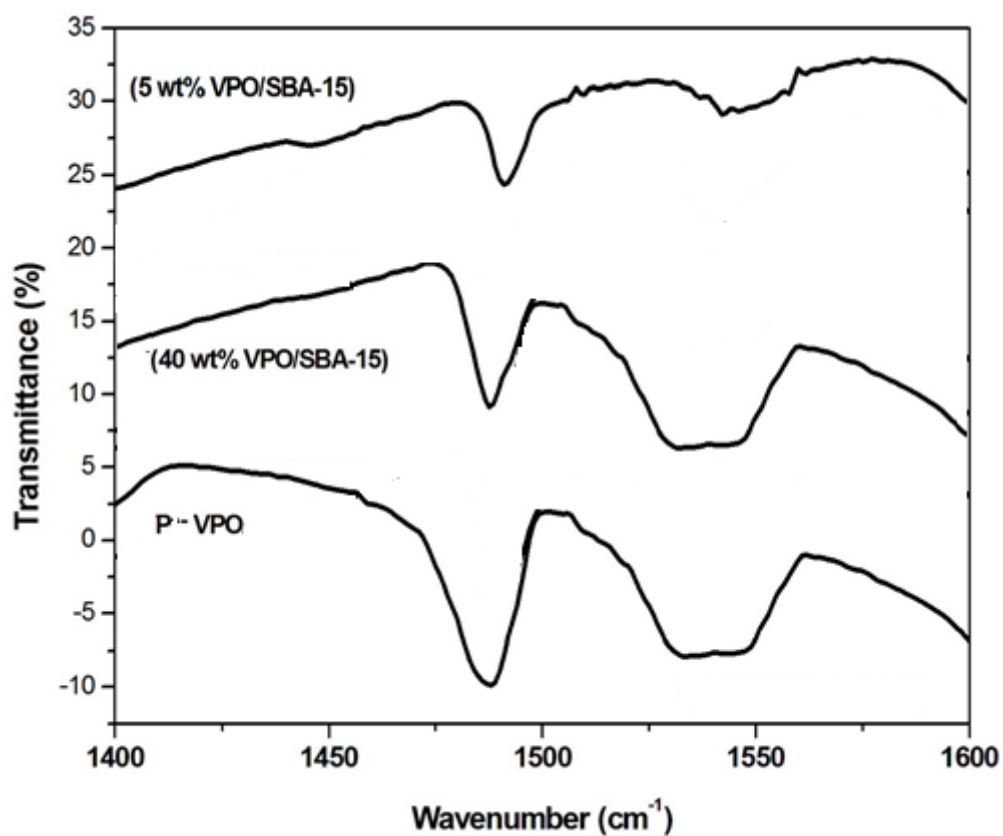

**Figure S2:** Ex-situ Pyridine adsorbed FT-IR images of pure VPO, 5wt% and 40 wt% VPO/SBA-15 samples.

Table S1: Comparison of catalytic activities with literature results

| S.No | Catalyst                                                                           | Reaction Conditions                                                                                               | Conversion | Selectivity |
|------|------------------------------------------------------------------------------------|-------------------------------------------------------------------------------------------------------------------|------------|-------------|
| 1    | 5% V <sub>2</sub> O <sub>5</sub> /TiO <sub>2</sub> -Nb <sub>2</sub> O <sub>5</sub> | Catalyst wt:0.5g,<br>toluene: NH <sub>3</sub> : air= 1:13:26                                                      | 85         | 90          |
| 2    | 5% V <sub>2</sub> O <sub>5</sub> /TiO <sub>2</sub> -SiO <sub>2</sub>               | Catalyst wt:0.5g,<br>toluene: NH <sub>3</sub> : air= 1:13:26                                                      | 77         | 67          |
| 3    | 5% V <sub>2</sub> O <sub>5</sub> /TiO <sub>2</sub> -ZrO <sub>2</sub>               | Catalyst wt:0.5g,<br>toluene: NH <sub>3</sub> : air= 1:13:26                                                      | 75         | 72          |
| 4    | FeSiSbCrV                                                                          | Temperature 400 °C,<br>toluene: O <sub>2</sub> : ammonia =<br>0.110:0.078: 0.494 atm<br>(partial pressure)        | 35         | 45          |
| 5    | V-P-O/gamma-Al <sub>2</sub> O <sub>3</sub>                                         | Weight:1g,<br>toluene: air: ammonia : 1 ml h <sup>-1</sup> ,<br>5.4 l h <sup>-1</sup> and 2.8 l h <sup>-1</sup> , | 64         | 100         |
| 6    | 10% Mo/Nb <sub>2</sub> O <sub>5</sub>                                              | Catalyst wt:0.5g ,<br>Toluene:NH <sub>3</sub> :air = 1:14:30                                                      | 65.2       | 71.2        |
| 7    | 10% Mo/TiO <sub>2</sub>                                                            | Catalyst wt:0.5g ,<br>Toluene:NH <sub>3</sub> :air = 1:14:30                                                      | 56.2       | 74.0        |
| 8    | 10% Mo/ZrO <sub>2</sub>                                                            | T=400 °C, Catalyst wt:0.5g,<br>Toluene:NH <sub>3</sub> :air = 1:14:30                                             | 64.0       | 68.4        |
| 9    | W64V36                                                                             | Catalyst wt:1.5g,<br>toluene/NH <sub>3</sub> /O <sub>2</sub> /He = 1/10/4/34.                                     | 99.9       | 93.0        |
| 10   | 40wt%VPO/SBA-15                                                                    | Catalyst wt:0.5g<br>toluene:NH <sub>3</sub> :air = 1:7:30                                                         | 92         | 98          |

Table S2: The results of percentage of V<sup>4+</sup>, V<sup>5+</sup> and the ratio of V<sup>5+</sup>/V<sup>4+</sup>

| <b>VPO Loadings (wt %)</b> | <b>(a)</b> | <b>(b)</b> | <b>(c)</b> | <b>(%V<sup>5+</sup>)</b> | <b>(%V<sup>4+</sup>)</b> | <b>Ratio of (V<sup>5+</sup>/V<sup>4+</sup>)</b> |
|----------------------------|------------|------------|------------|--------------------------|--------------------------|-------------------------------------------------|
| 5                          | 288        | 431        | 719        | 40.06                    | 59.94                    | 0.67                                            |
| 10                         | 802        | 1092       | 1894       | 42.34                    | 57.66                    | 0.73                                            |
| 20                         | 1628       | 1735       | 3363       | 48.41                    | 51.59                    | 0.94                                            |
| 30                         | 2492       | 2364       | 4856       | 51.32                    | 48.68                    | 1.05                                            |
| 40                         | 3087       | 3554       | 6641       | 46.48                    | 53.52                    | 0.87                                            |
| 50                         | 1951       | 5237       | 7188       | 27.14                    | 72.86                    | 0.37                                            |
| Pure VPO                   | 1954       | 6053       | 8007       | 24.40                    | 75.60                    | 0.32                                            |

a-H<sub>2</sub> consumption (μ mol/g) related to V<sup>5+</sup>, b- H<sub>2</sub>consumption (μ mol/g) related to V<sup>4+</sup>,

C-Total H<sub>2</sub> consumption (μ mol/g)
